# Supplementary material for: Coupling with a narrow-band-gap semiconductor for enhancement of visible-light photocatalytic activity: preparation of Bi2S3/g-C3N4 and application for degradation of RhB
Source: Royal Society of Chemistry journal article supplement (doi:10.1039/c4ra15715j), 2015-01-01
Supplement: c4ra15715j1.pdf [file c4ra15715j1.pdf]

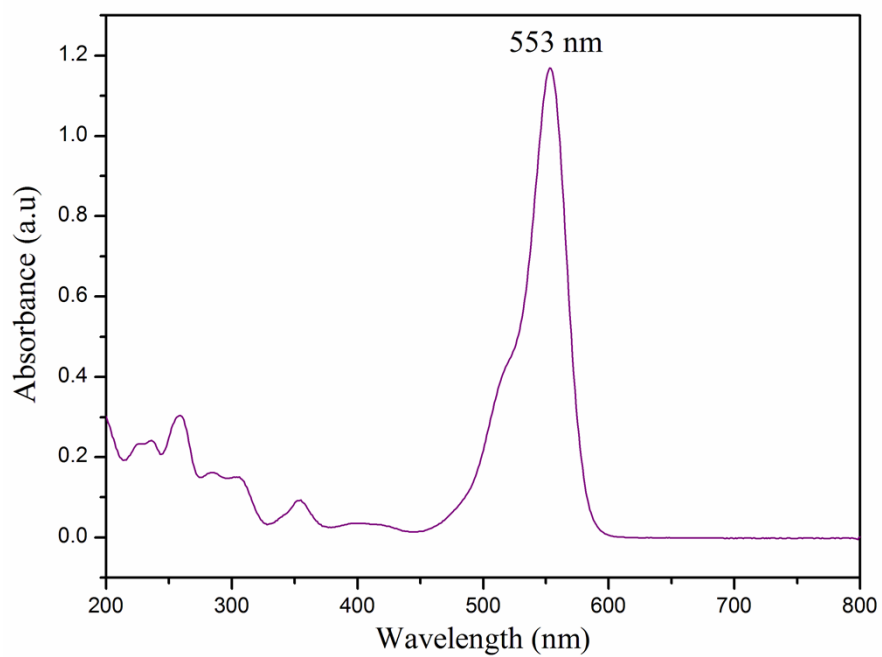

Fig. S1. Absorption curve of RhB

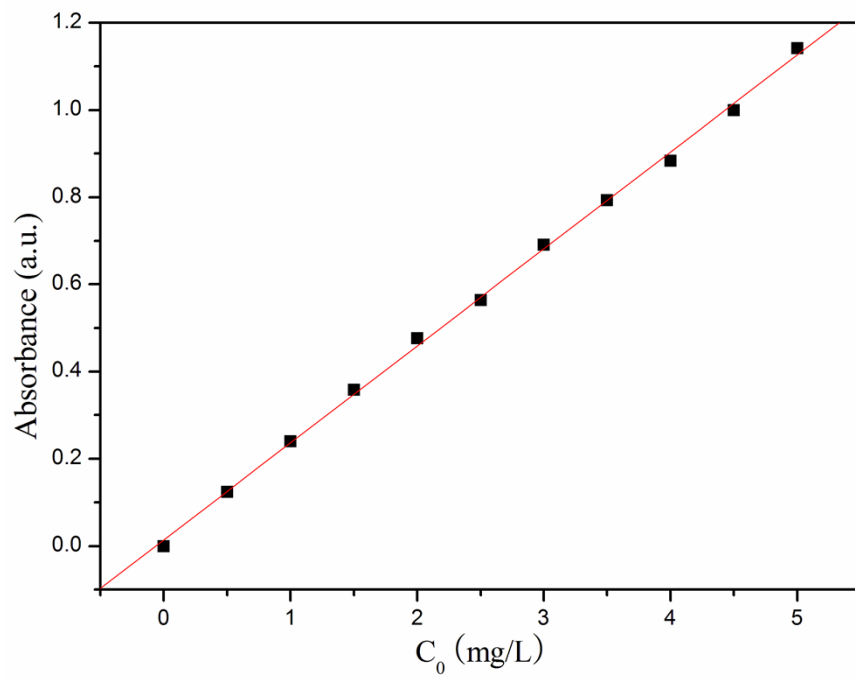

Fig. S2. Linear calibration of absorbance against concentration

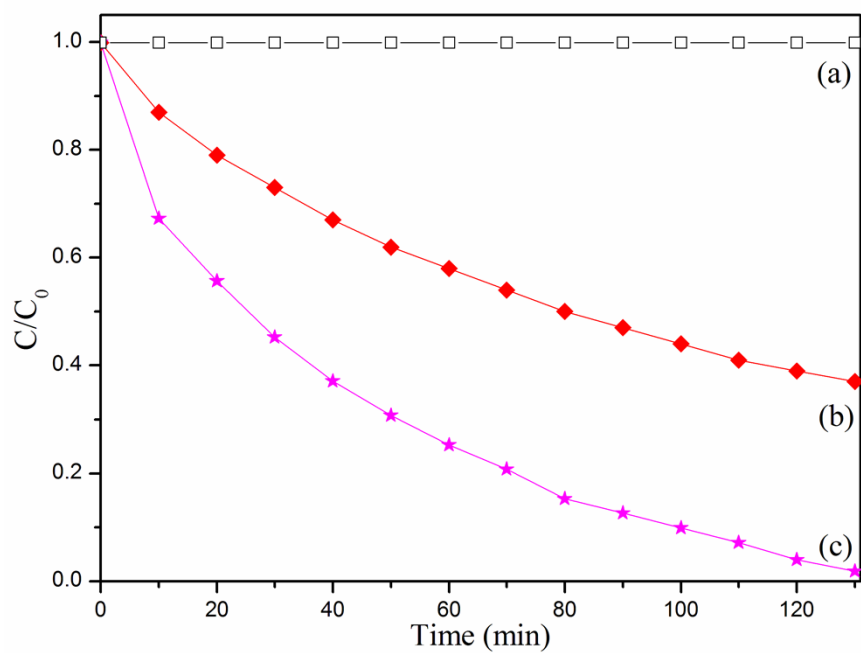

Fig. S3. The photocatalytic activity comparisons of RhB for blank experiment (a),  $\text{Bi}_2\text{S}_3\&\text{g-C}_3\text{N}_4\text{-4}$  (b, prepared by mechanical mixing method) and  $\text{Bi}_2\text{S}_3/\text{g-C}_3\text{N}_4\text{-4}$  (c, prepared by hydrothermal method) samples

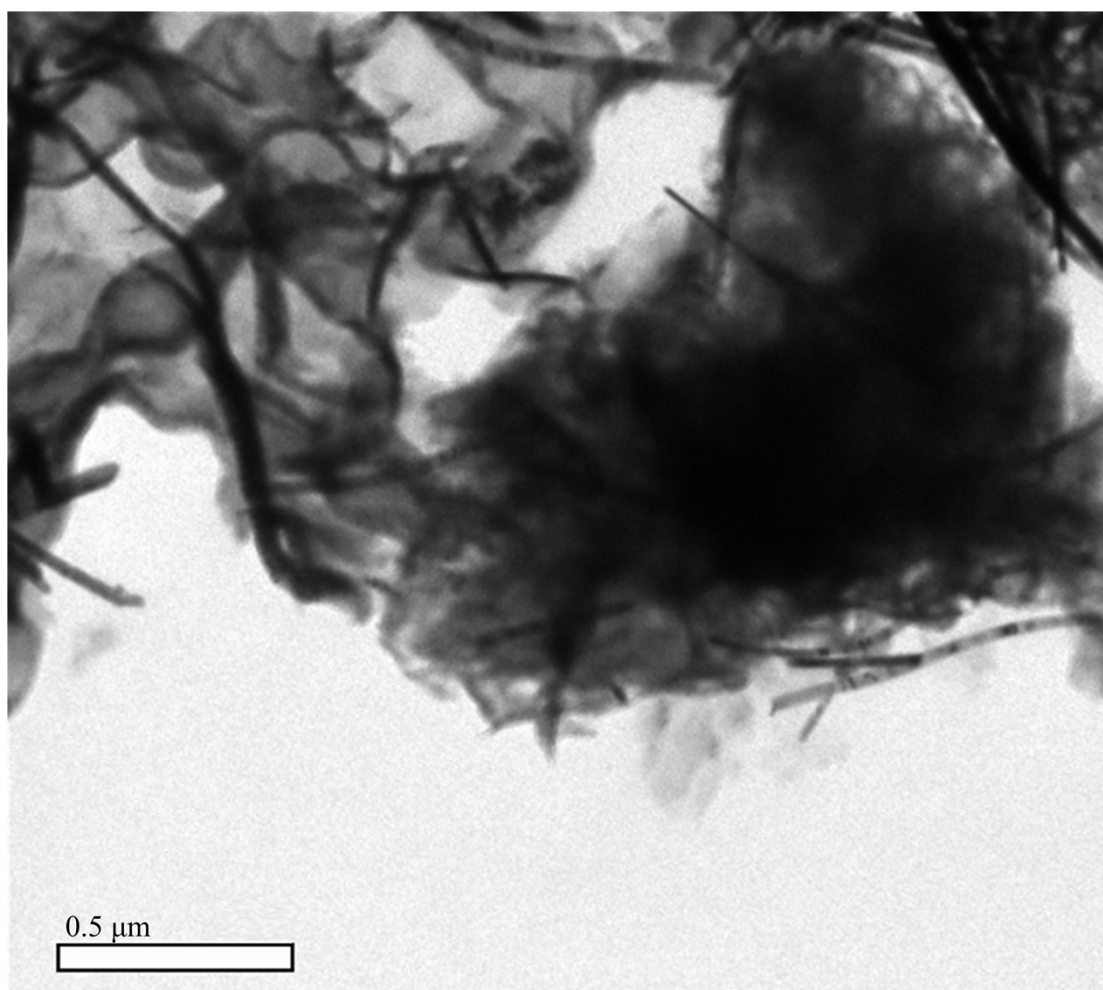

Fig. S4. TEM image of  $\text{Bi}_2\text{S}_3/\text{g-C}_3\text{N}_4\text{-5}$

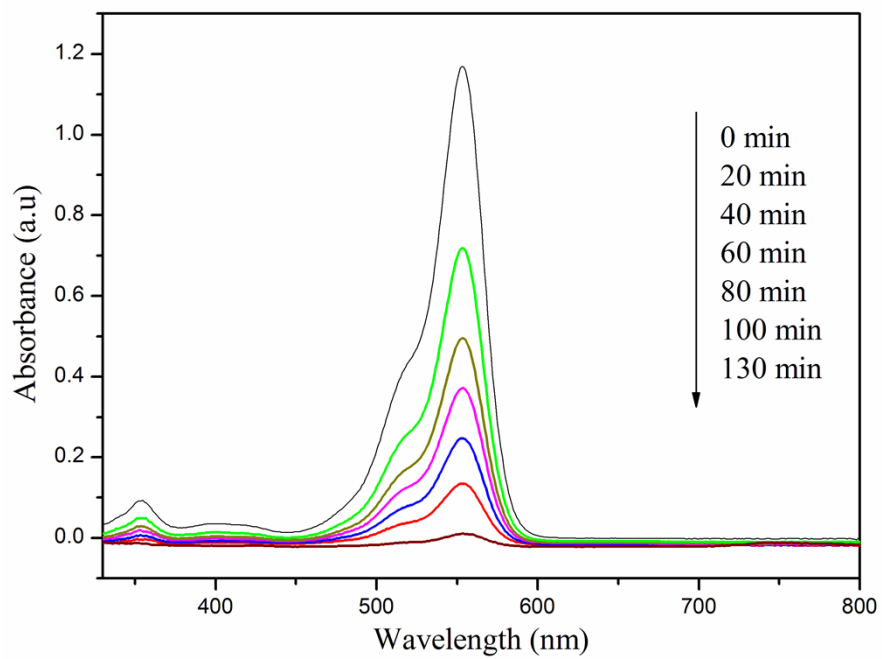

Fig. S5. Evolutions of absorption spectra of RhB with different time

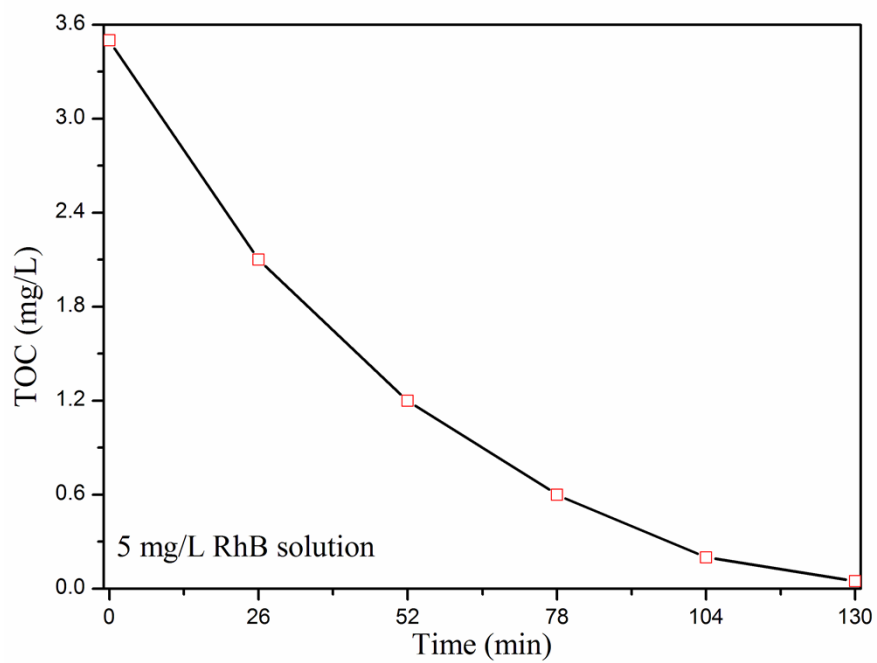

Fig. S6. TOC evolution versus irradiation time in the photocatalytic reaction
